# Supplementary material
Source: Springer Nature journal article supplement (https://www.springermedizin.de/resource/supplementary/12931_2011_1118_MOESM2_ESM.pdf/9425684)
Supplement: MOESM2 [file 9425684]

*D. pteronyssinus*

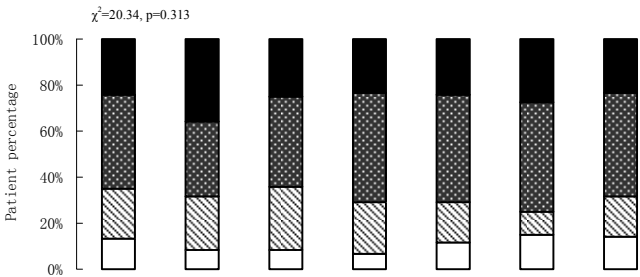

*D. farinae*

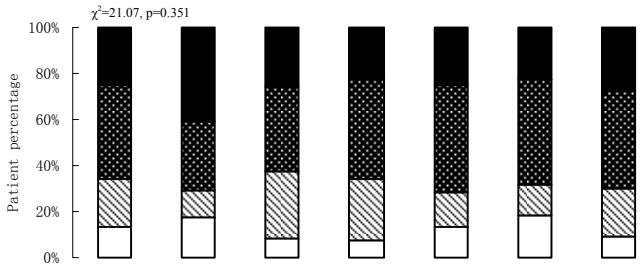

*Artemisia vulgaris*

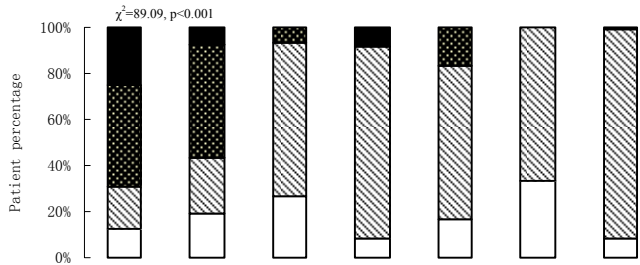

*Ambrosia artemisifolia*

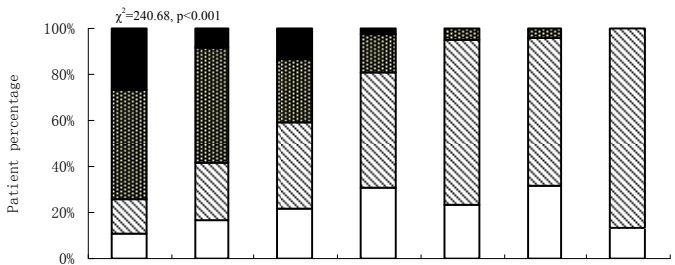

0-0.35    0.35-0.7    0.7-3.5    3.5-17.5    17.5-50    50-100    >100

Specific IgE (KU/L)

□ Mild intermittent

▨ Moderate-severe intermittent

▩ Mild persistent

■ Moderate-severe persistent
